# Supplementary material
Source: publisher figshare collection journal article supplement (https://geolsoc.figshare.com/ndownloader/files/5424365)
Supplement: Supplementary file 1 [file 5424365]

LA-ICPMS data from sample E1101-92.2
								Corrected isotope ratios															Dates (Ma)											207-corrected		208-corrected			Concentrations (ppm)
		U	Th	Pb*		206Pb		208Pb*	�2s	206Pb*	�2s	207Pb*	�2s	206Pb*	�2s	error	238U	�2s	207Pb*	�2s	error		208Pb*	�2s	207Pb*	�2s	207Pb*	�2s	206Pb*	�2s		%		206Pb*	�2s	206Pb*	�2s
Analysis	Notes	ppm	ppm	ppm	Th/U	204Pb		232Th	(%)	207Pb*	(%)	235U*	(%)	238U	(%)	corr.	206Pb*	(%)	206Pb*	(%)	corr.		232Th	(Ma)	206Pb*	(Ma)	235U	(Ma)	238U*	(Ma)		disc.		238U*	(Ma)	238U*	(Ma)		P	Ti	Y	Zr	Nb	La	Ce	Pr	Nd	Sm	Eu
E1101-92.2 L 61 12/2/2013 5:29:04 PM (Run: 1)		44	51	12.9	1.16	477.53064		0.0624463	7.388776346	12.73996101	3.963134277	2.20091	6.4	0.20336	5.0	0.79	4.917344857	5.032693397	0.07849	4.0	0		1224	88	1159	79	1181	45	1193	55		3		1181.233819	58.11345043	1187.908705	1512.907238		259	29.96752102	1016	516432.1408	0.91	0.05	4.58	0.18	3.71	6.10	0.81
E1101-92.2 L 63 12/2/2013 5:32:28 PM (Run: 1)	high U signal variance	147	106	48.8	0.73	5901.02849		0.076551123	6.806772972	11.19959449	1.712827132	3.13598	5.2	0.25473	4.9	0.94	3.925771779	4.923239133	0.08929	1.7	-4.21304E-16		1491	98	1410	33	1442	40	1463	64		4		1441.42448	69.80087937	1460.030964	869.4659044		234	12.07449116	959	516619.1838	4.73	0.08	16.70	0.07	1.61	4.40	0.19
E1101-92.2 L 64 12/2/2013 5:34:10 PM (Run: 1)		376	174	98.5		5842.378316		0.063128977	6.790847622	11.56332047	1.369571791	2.55856	4.3	0.21457	4.0	0.95	4.660396129	4.028711177	0.08648	1.4	6.43886E-16		1237	82	1349	26	1289	31	1253	46		8		1289.150634	48.39184281	1254.134962	905.5215054
E1101-92.2 L 65 12/2/2013 5:35:51 PM (Run: 1)		360	177	125.9	0.49	55695.60758		0.079106316	7.522925981	9.719274176	1.944552101	4.00070	4.9	0.28201	4.5	0.92	3.54594185	4.510986522	0.10289	1.9	2.02507E-16		1539	111	1677	36	1634	40	1601	64		5		1634.522205	69.89732269	1605.446555	927.97637		195	4.329250996	561	513006.3255	8.29	0.03	11.14	0.00	0.52	1.32	0.26
E1101-92.2 L 66 12/2/2013 5:37:33 PM (Run: 1)		17	6	14.2	0.37	685.1237407		0.172884405	10.9264147	4.236735497	2.779730673	20.00829	5.4	0.61481	4.7	0.86	1.626521892	4.673820528	0.23603	2.8	1.36727E-16		3223	326	3093	44	3092	53	3089	115		0		3091.761555	202.3435989	3084.570884	197.0599782		156	3.92	560	543496.1977	0.71		3.47		0.32	1.50	0.98
E1101-92.2 L 68 12/2/2013 5:40:57 PM (Run: 1)		199	161	63.3	0.81	5732.531935		0.069774173	7.406178368	11.0886959	1.201936712	2.98466	5.2	0.24003	5.1	0.97	4.166066145	5.054574068	0.09018	1.2	-2.92391E-16		1363	98	1429	23	1404	40	1387	63		3		1403.832669	67.47507732	1389.545244	334.3818859		208	11.51	694	508352.6896	2.94		26.20	0.08	1.48	3.30	0.99
E1101-92.2 L 69 12/2/2013 5:42:39 PM (Run: 1)		29	25	18.7	0.88	1114.851103		0.133299554	8.329639865	6.073975783	2.616511134	10.46055	5.1	0.46081	4.3	0.86	2.170069138	4.332106969	0.16464	2.6	3.13428E-16		2529	198	2504	44	2476	47	2443	88		3		2476.521473	113.4614908	2434.520855	855.265202		150	12.17	241	523996.7946	0.76		7.34	0.02	0.25	0.55	0.32
E1101-92.2 L 70 12/2/2013 5:44:20 PM (Run: 1)		12	12	3.6	1.02	100.6390418		0.069252912	12.26542054	11.46584856	5.296128326	2.57747	7.7	0.21434	5.6	0.73	4.665526124	5.631843278	0.08722	5.3	-1.19111E-16		1353	161	1365	102	1294	57	1252	64		9		1294.581062	67.78808616	1236.551347	1328.329784		154	24.72	322	522322.9385	0.48		1.88	0.02	0.68	1.75	0.27
E1101-92.2 L 72 12/2/2013 5:51:20 PM (Run: 1)		158	191	41.1	1.21	14623.29293		0.058157904	7.061235338	12.51404042	2.457154505	1.93777	6.4	0.17587	5.9	0.92	5.68591743	5.879652811	0.07991	2.5	0		1143	78	1195	48	1094	43	1044	57		14		1094.668479	58.71694572	1025.625918	1511.590291		267	12.45	1006	512864.6953	4.64	0.03	49.69	0.13	1.91	4.32	1.21
E1101-92.2 L 73 12/2/2013 5:53:02 PM (Run: 1)	high U signal variance	93	57	82.5	0.61	4496.813518		0.168654989	7.246396471	3.810522589	1.247994445	22.49322	4.7	0.62163	4.5	0.96	1.608662831	4.523030233	0.26243	1.2	3.14694E-16		3150	211	3261	20	3205	46	3116	112		6		3205.406221	212.0234652	3114.451388	266.3791169		135	5.14	638	511207.0096	0.54		5.50	0.03	1.17	2.46	1.01
E1101-92.2 L 74 12/2/2013 5:54:44 PM (Run: 1)		44	83	14.7	1.90	3761.822278		0.060830219	7.045997653	11.64512905	3.937721996	2.41719	6.3	0.20415	4.9	0.78	4.898306818	4.878468373	0.08587	3.9	0		1194	82	1335	76	1248	45	1198	53		11		1248.10997	56.00850395	1198.891862	4775.535613		260	25.05	621	509055.6802	1.33		23.01	0.09	2.07	3.95	1.33
E1101-92.2 L 75 12/2/2013 5:56:25 PM (Run: 1)	high U signal variance	86	77	28.6	0.90	12353.10307		0.072233076	7.898652642	11.36222143	2.351259551	2.98591	5.3	0.24606	4.8	0.90	4.064067553	4.792811034	0.08801	2.4	1.5763E-16		1410	108	1383	45	1404	41	1418	61		3		1403.941337	65.7996535	1419.181831	1804.457271		234	17.96	730	530633.5451	2.79		13.68	0.04	1.02	2.94	0.25
E1101-92.2 M 100 12/2/2013 6:49:26 PM (Run: 1)		242	98	97.4	0.40	2211.70357		0.118960047	6.874637797	9.155133821	1.676944471	4.81234	5.2	0.31954	4.9	0.95	3.129538891	4.879962055	0.10923	1.7	0		2272	148	1787	31	1787	43	1787	76		0		1787.055	85.44655642	1763.166487	409.1743876		401	6.53	807	420982.9574	1.52		7.75	0.06	1.28	2.86	0.31
E1101-92.2 M 101 12/2/2013 6:58:14 PM (Run: 1)		438	289	119.4	0.66	9928.038978		0.078629371	6.609385391	11.9592492	2.523587087	2.34895	6.4	0.20374	5.9	0.92	4.908204958	5.906035637	0.08362	2.5	0		1530	97	1284	49	1227	46	1195	64		8		1227.492259	67.71171652	1163.829468	748.8488777		134	5.09	1375	431665.9106	1.22	0.04	15.44	0.41	7.15	15.26	1.51
E1101-92.2 M 102 12/2/2013 6:59:56 PM (Run: 1)		36	34	10.6	0.95	443.3008482		0.075481076	9.62204834	12.78121555	5.478095757	2.25460	8.2	0.20900	6.1	0.74	4.784756191	6.084782047	0.07824	5.5	-2.13165E-16		1471	136	1153	109	1198	58	1223	68		7		1198.01715	72.2401851	1188.647088	1030.977669		242	28.93	782	424923.8153	0.63		5.92	0.14	4.04	7.31	1.42
E1101-92.2 M 103 12/2/2013 7:01:38 PM (Run: 1)	high U signal variance	161	91	53.6	0.57	2824.603367		0.099359372	6.63910405	10.73963896	2.039550022	3.25609	5.3	0.25362	4.9	0.92	3.942899073	4.910512481	0.09311	2.0	0		1915	121	1490	39	1471	41	1457	64		2		1470.717187	69.05017629	1422.036256	416.1650703		197	9.18	498	408064.8839	2.37		16.47	0.04	0.61	1.45	0.16
E1101-92.2 M 104 12/2/2013 7:03:20 PM (Run: 1)		96	79	65.7		3764.362679		0.176168948	6.556006243	6.144305843	2.309131634	10.43205	5.4	0.46488	4.9	0.90	2.151091255	4.90781971	0.16275	2.3	1.56745E-16		3280	198	2484	39	2474	50	2461	100		1		2473.936148	129.4512992	2383.009564	1302.174708
E1101-92.2 M 106 12/2/2013 7:06:43 PM (Run: 1)		60	30	40.9		2180.877989		0.195032575	7.854469702	5.584576327	2.008858425	12.36004	5.1	0.50062	4.6	0.92	1.997519525	4.645621164	0.17906	2.0	0		3601	259	2644	33	2632	48	2616	100		1		2632.183845	135.7017103	2562.792277	426.4040776
E1101-92.2 M 107 12/2/2013 7:08:25 PM (Run: 1)		244	71	91.7	0.29	2251.215596		0.122188467	7.110806642	9.087637791	1.895231876	4.64655	5.2	0.30625	4.9	0.93	3.265270997	4.850232636	0.11004	1.9	-1.93244E-16		2330	156	1800	34	1758	44	1722	73		5		1757.853691	81.27181319	1700.396274	243.3500983		603	9.16	1099	405954.691	0.81	0.02	1.55	0.10	1.50	4.91	0.34
E1101-92.2 M 108 12/2/2013 7:10:07 PM (Run: 1)	high U signal variance	35	18	11.5	0.52	363.3926321		0.102676129	8.388024239	10.24989596	4.719995097	3.33352	7.4	0.24781	5.7	0.77	4.035328556	5.673834032	0.09756	4.7	1.32661E-16		1976	158	1578	88	1489	58	1427	73		11		1489.327735	77.85951824	1388.961569	306.098958		312	27.83	652	421240.8445	1.32	0.24	4.70	0.12	1.80	4.43	0.65
E1101-92.2 M 109 12/2/2013 7:11:49 PM (Run: 1)		137	56	56.1	0.41	4120.829686		0.127640587	7.242457259	9.46295111	2.147351122	4.68828	5.4	0.32176	4.9	0.92	3.107858648	4.920996333	0.10568	2.1	0		2428	166	1726	39	1765	45	1798	77		5		1764.981772	87.03448227	1766.0396	391.2822167		116	7.89	526	405754.1726	0.76		12.12	0.02	1.03	3.01	0.76
E1101-92.2 M 111 12/2/2013 7:18:48 PM (Run: 1)		189	157	66.7	0.83	11443.4984		0.102352592	6.704008316	10.71099328	2.189977837	3.15726	4.4	0.24527	3.9	0.87	4.077187495	3.854875645	0.09336	2.2	-2.10417E-16		1970	126	1495	41	1447	34	1414	49		6		1446.990727	52.46417192	1348.26369	1104.568127		287	10.13	1030	411465.6988	1.03	0.01	17.07	0.22	4.02	6.97	1.17
E1101-92.2 M 113 12/2/2013 7:22:12 PM (Run: 1)		76	35	52.2	0.46	1627.234735		0.195942092	6.980908794	5.630021642	1.981264594	12.34263	4.9	0.50398	4.4	0.91	1.984190621	4.449442606	0.17762	2.0	0		3617	231	2631	33	2631	46	2631	96		0		2630.821167	130.9503481	2581.802249	442.0848998		402	10.77	732	406358.4096	0.43		3.32	0.15	3.51	4.56	0.87
E1101-92.2 M 114 12/2/2013 7:23:54 PM (Run: 1)	reverse fractionation	147	80	53.3	0.55	4794.472846		0.115203327	7.4002589	10.05561384	2.345824649	3.74287	4.9	0.27297	4.4	0.88	3.663433129	4.352432753	0.09945	2.3	0		2204	155	1614	44	1581	40	1556	60		4		1580.733067	65.50623738	1508.647057	1018.708733		210	16.21	483	421192.2143	2.09		9.48	0.05	0.99	2.63	0.56
E1101-92.2 M 115 12/2/2013 7:25:35 PM (Run: 1)		91	60	39.9	0.66	2017.458022		0.130490696	6.836821684	9.127327502	3.178647616	4.80663	5.9	0.31819	5.0	0.84	3.142798311	4.978243094	0.10956	3.2	2.24513E-16		2479	160	1792	58	1786	50	1781	77		1		1786.085721	86.96844689	1721.134562	1212.502856		209	10.21	535	425509.8753	1.06		7.96	0.11	2.16	3.99	0.39
E1101-92.2 M 116 12/2/2013 7:27:17 PM (Run: 1)	high U signal variance	207	101	61.0	0.49	4732.642554		0.08452465	8.036176148	10.96370016	2.228511432	2.92633	5.7	0.23269	5.3	0.92	4.297556002	5.266188419	0.09121	2.2	-3.02725E-16		1640	127	1451	42	1389	43	1349	64		8		1389.019911	68.13733415	1329.295489	842.7275643		209	10.25	619	381858.0893	4.29	0.06	6.88	0.07	1.46	2.21	0.40
E1101-92.2 M 117 12/2/2013 7:28:59 PM (Run: 1)		471	98	174.2	0.21	31462.85887		0.112352972	7.033052202	9.045322593	1.708231256	4.75383	4.7	0.31186	4.4	0.93	3.206517082	4.402876436	0.11055	1.7	2.36182E-16		2152	144	1809	31	1777	40	1750	67		4		1776.918185	75.13969557	1739.699354	319.6851164		270	7.44	526	413050.2776	2.20	0.02	2.04	0.05	0.87	3.01	0.53
E1101-92.2 M 118 12/2/2013 7:30:41 PM (Run: 1)	reverse fractionation	217	263	67.2	1.21	3284.070618		0.082589861	7.128994854	12.24266683	3.355879267	2.18106	6.1	0.19366	5.1	0.83	5.163668503	5.053411931	0.08168	3.4	-2.09493E-16		1604	110	1238	66	1175	42	1141	53		9		1175.293546	55.35278065	1052.55222	1811.217418		243	10.04	706	415398.1997	1.65	0.03	32.64	0.20	3.46	5.93	2.50
E1101-92.2 M 119 12/2/2013 7:32:23 PM (Run: 1)		89	61	31.9	0.69	981.4949348		0.105301763	7.455885834	10.81779788	3.005720749	3.31900	5.7	0.26040	4.8	0.85	3.840214082	4.797449821	0.09244	3.0	-2.46378E-16		2024	144	1476	57	1486	44	1492	64		1		1485.488563	69.3931136	1441.90116	865.9835594		217	12.37	608	424459.2071	0.87		19.64	0.05	1.13	3.49	1.30
E1101-92.2 M 120 12/2/2013 7:34:04 PM (Run: 1)		153	214	52.8	1.40	15403.20128		0.084743583	6.637087648	12.20919191	1.697209304	2.36322	4.7	0.20926	4.4	0.93	4.778712683	4.425454801	0.08191	1.7	2.36503E-16		1644	105	1243	33	1232	34	1225	49		2		1231.608309	52.1927706	1131.311899	1022.389269		172	31.51	587	428896.6411	1.00	0.04	28.35	0.32	7.16	11.05	2.59
E1101-92.2 M 121 12/2/2013 7:42:47 PM (Run: 1)		110	180	39.0	1.64	2547.040619		0.080773074	6.742391202	12.18669131	2.566609152	2.33381	5.6	0.20628	5.0	0.89	4.847858141	5.022032459	0.08206	2.6	-1.37813E-16		1570	102	1247	50	1223	40	1209	55		3		1222.747404	58.42259363	1110.558663	1990.57161		155	4.90	689	435259.5332	1.20	0.06	14.64	0.44	4.54	4.96	2.69
E1101-92.2 M 77 12/2/2013 5:59:52 PM (Run: 1)		83	71	22.3	0.85	465.7819956		0.068835735	11.51432104	12.37932311	2.221499728	2.17504	5.6	0.19528	5.2	0.92	5.120800834	5.152861393	0.08078	2.2	3.1036E-16		1346	150	1216	44	1173	39	1150	54		6		1173.28267	56.90622145	1125.285686	1628.02899		187	12.22	545	411350.7132	2.12	0.04	8.02	0.09	1.20	2.88	0.42
E1101-92.2 M 78 12/2/2013 6:01:34 PM (Run: 1)		94	148	54.4	1.57	26763.88187		0.130782764	6.949748562	8.476124435	1.783769366	5.39191	4.6	0.33147	4.2	0.92	3.01690109	4.206204514	0.11798	1.8	-2.36756E-16		2484	162	1926	32	1884	39	1845	68		5		1883.743269	76.15825858	1699.560249	1591.051396		401	11.58	577	399063.5778	2.47		36.75	0.25	5.14	9.20	1.12
E1101-92.2 M 80 12/2/2013 6:04:57 PM (Run: 1)		204	87	129.8	0.43	3630.529781		0.189779101	6.826172968	5.885961401	2.226267216	11.13429	4.9	0.47531	4.4	0.89	2.103881566	4.414036274	0.16990	2.2	1.80766E-16		3512	220	2557	37	2534	46	2507	92		2		2534.505351	120.1737512	2459.626276	225.4644628		195	5.74	404	404486.2836	0.94	0.01	8.18	0.08	1.00	3.06	0.42
E1101-92.2 M 81 12/2/2013 6:13:38 PM (Run: 1)		339	230	123.7	0.68	16726.9048		0.10449091	6.714349519	9.302718	2.621060708	3.92996	4.7	0.26515	3.9	0.83	3.77140296	3.88519956	0.10750	2.6	-1.74437E-16		2009	128	1757	48	1620	38	1516	52		15		1620.458471	56.45078829	1470.761417	632.9995331		236	4.54	768	401189.1631	5.38	0.26	36.39	0.17	1.64	2.84	1.14
E1101-92.2 M 82 12/2/2013 6:15:20 PM (Run: 1)		138	133	70.3	0.96	10635.82647		0.13492367	6.609585135	8.736093557	1.887570652	5.36794	4.8	0.34011	4.4	0.92	2.940197165	4.360000845	0.11447	1.9	-4.31688E-16		2558	159	1872	34	1880	41	1887	71		1		1879.719856	81.24863014	1801.903758	1042.266267		283	12.01	736	407903.2173	1.93	0.01	25.67	0.07	1.45	3.01	0.49
E1101-92.2 M 84 12/2/2013 6:18:44 PM (Run: 1)		229	127	75.4	0.55	12893.99589		0.1018818	6.671864064	10.86311964	2.169414596	3.16988	5.0	0.24974	4.5	0.90	4.004091766	4.492142945	0.09205	2.2	-1.82278E-16		1961	125	1469	41	1450	39	1437	58		2		1449.935537	62.30127044	1397.821817	1078.735854		291	7.83	728	410671.3037	3.22	2.26	26.21	0.72	4.29	4.39	0.21
E1101-92.2 M 85 12/2/2013 6:20:26 PM (Run: 1)		40	43	12.4	1.08	255.5246403		0.083726669	7.136361016	12.93994287	4.548864177	2.18405	7.6	0.20497	6.1	0.80	4.878735401	6.104250188	0.07728	4.5	1.27945E-16		1625	111	1128	91	1176	53	1202	67		7		1175.753375	71.12842145	1132.491169	2407.822131		241	34.15	496	407126.8133	1.01		14.20	0.06	2.06	4.15	1.30
E1101-92.2 M 86 12/2/2013 6:22:07 PM (Run: 1)	burn through?	139	109	51.1	0.78	4905.299893		0.098442046	7.78622917	10.79339087	2.365731162	3.39657	7.0	0.26589	6.6	0.94	3.760998188	6.571558956	0.09265	2.4	0		1898	141	1481	45	1504	55	1520	89		3		1503.501356	96.88110809	1479.414418	741.6970529		265	15.62	633	403214.909	0.70	0.02	16.48	0.19	3.93	4.82	2.61
E1101-92.2 M 87 12/2/2013 6:23:48 PM (Run: 1)		131	77	53.4	0.59	2493.686774		0.125070661	7.086901433	9.042897455	1.948878254	4.58311	5.5	0.30058	5.2	0.94	3.326850377	5.189875967	0.11058	1.9	0		2382	159	1809	35	1746	46	1694	77		7		1746.466568	85.26805771	1641.648765	631.6385187		272	8.36	1048	397431.1562	1.40		4.29	0.05	2.89	6.77	0.89
E1101-92.2 M 88 12/2/2013 6:25:30 PM (Run: 1)		59	36	25.4	0.61	1553.704034		0.129805102	8.1022385	9.054208898	3.272517536	4.79463	5.9	0.31485	4.9	0.83	3.176112958	4.931361526	0.11045	3.3	-2.20146E-16		2467	188	1807	59	1784	50	1765	76		3		1784.054424	85.19481575	1708.999491	677.4380339		340	18.83	590	410723.7263	0.79		3.28	0.10	1.63	3.84	0.45
E1101-92.2 M 89 12/2/2013 6:27:12 PM (Run: 1)		406	225	126.6		27653.53233		0.092950054	7.062131325	11.01526819	2.334562845	2.98867	5.2	0.23877	4.6	0.89	4.188214643	4.603569819	0.09078	2.3	1.65284E-16		1796	121	1442	44	1405	39	1380	57		5		1404.904861	61.15948487	1348.835989	508.6516535
E1101-92.2 M 90 12/2/2013 6:28:53 PM (Run: 1)		80	46	27.7	0.58	15073.11844		0.112804782	7.807009817	10.17728569	3.060208659	3.47093	5.7	0.25620	4.9	0.85	3.903219303	4.865761781	0.09826	3.1	2.38593E-16		2160	160	1591	57	1521	45	1470	64		8		1520.944763	68.8459421	1416.283866	651.8151		252	9.46	720	408248.1551	0.72		9.15	0.06	1.23	2.64	0.44
E1101-92.2 M 91 12/2/2013 6:34:11 PM (Run: 1)		102	68	44.4	0.66	2355.078955		0.1288121	6.983473045	9.061845139	1.696959244	4.79015	5.0	0.31482	4.7	0.94	3.176402583	4.663311976	0.11035	1.7	-4.48946E-16		2449	161	1805	31	1783	42	1764	72		3		1783.266469	80.36110275	1705.362994	629.6626551		97	18.08	222	407886.8628	0.69		8.51	0.17	2.75	4.52	0.28
E1101-92.2 M 92 12/2/2013 6:35:53 PM (Run: 1)	high U signal variance	236	123	75.6	0.52	1214.455188		0.10241149	6.692812802	10.97180081	1.770277709	3.07753	5.2	0.24489	4.9	0.94	4.083393167	4.887312778	0.09114	1.8	0		1971	126	1450	34	1427	40	1412	62		3		1427.2123	66.50447821	1372.668727	654.9228012		363	8.70	1279	403824.5285	3.59		18.84	0.04	1.03	3.92	1.09
E1101-92.2 M 93 12/2/2013 6:37:35 PM (Run: 1)		50	27	16.3	0.53	2894.563602		0.107603645	8.457111888	11.42645928	3.359568305	2.96809	6.8	0.24597	5.9	0.87	4.065488466	5.914254335	0.08752	3.4	-1.78804E-16		2066	166	1372	65	1399	52	1418	75		4		1399.362044	81.24857701	1370.624429	509.5929392		85	3.86	250	415948.2238	0.31		7.51	0.02	0.15	0.54	0.52
E1101-92.2 M 94 12/2/2013 6:39:16 PM (Run: 1)		66	168	43.8		1420.433235		0.126044319	6.570111804	8.779715071	2.317557806	4.83013	5.9	0.30757	5.5	0.92	3.251334487	5.473077544	0.11390	2.3	0		2399	149	1863	42	1790	50	1729	83		8		1790.463112	91.89344116	1426.509181	6510.862235
E1101-92.2 M 95 12/2/2013 6:40:58 PM (Run: 1)		22	17	7.7		788.1168352		0.103631006	8.238462594	10.94761691	5.597435197	3.15791	8.0	0.25074	5.8	0.72	3.988251907	5.76471494	0.09134	5.6	0		1993	156	1454	106	1447	62	1442	74		1		1446.963093	80.65142638	1379.56457	1620.898485
E1101-92.2 M 97 12/2/2013 6:44:21 PM (Run: 1)	high U signal variance	18	60	20.4	3.42	2209.106598		0.171308817	7.09669713	6.156659899	4.079232767	10.99289	7.7	0.49086	6.6	0.85	2.037249359	6.560350446	0.16243	4.1	0		3196	210	2481	69	2523	72	2574	139		5		2522.39057	185.2612848	2228.417182	5336.225827		174	25.04	287	430309.7917	0.56		18.81	0.07	1.63	2.67	0.45
E1101-92.2 M 99 12/2/2013 6:47:44 PM (Run: 1)	burn through?	173	161	48.6	0.93	1646.181993		0.056697748	9.522802874	12.1550715	4.814218395	2.39751	7.6	0.21136	5.9	0.78	4.731338468	5.903880866	0.08227	4.8	-2.49992E-16		1115	103	1252	94	1242	55	1236	66		1		1241.9012	70.44730858	1252.438661	1341.781147		172	36.32	554	417673.9943	1.23	0.24	19.18	0.41	3.21	7.84	3.00
E1101-92.2 M 122 12/2/2013 7:44:30 PM (Run: 1)		92	133	31.7	1.45	1935.941998		0.080136707	6.626861925	12.11515196	2.043160968	2.39517	6.1	0.21046	5.7	0.94	4.751552175	5.719483768	0.08254	2.0	0		1558	99	1258	40	1241	44	1231	64		2		1241.235632	67.7664231	1155.612618	1656.964708		286	17.76	671	431224.1454	3.09		42.85	0.06	1.75	4.18	0.72
E1101-92.2 M 123 12/2/2013 7:46:12 PM (Run: 1)		212	172	147.8		9384.809284		0.16019808	7.834972047	5.939406493	1.505726046	11.25540	5.6	0.48484	5.4	0.96	2.062515585	5.437941048	0.16837	1.5	6.50835E-16		3003	219	2541	25	2545	53	2548	114		0		2544.506119	151.0599014	2506.897233	821.1567287
E1101-92.2 M 125 12/2/2013 7:49:35 PM (Run: 1)		191	58	79.6	0.31	2720.276649		0.116603111	7.163098145	8.806795679	2.172693502	5.36517	5.0	0.34269	4.5	0.90	2.91809766	4.450972937	0.11355	2.2	-1.83686E-16		2229	151	1857	39	1879	42	1900	73		-2		1879.219421	83.67410649	1887.529946	513.1406669		154	6.40	478	472794.5849	1.30		6.35	0.02	0.93	2.12	0.31
E1101-92.2 M 126 12/2/2013 7:51:17 PM (Run: 1)		55	85	18.1	1.54	679.1289159		0.068924999	7.483265637	12.67954088	3.695260836	2.24099	5.9	0.20608	4.6	0.78	4.852411431	4.603488987	0.07887	3.7	-2.08847E-16		1347	98	1169	73	1194	41	1208	51		-3		1193.854257	53.82828431	1173.11364	1003.917795		207	15.01	1812	490629.1841	1.32	0.10	3.56	0.56	10.41	18.49	1.30
E1101-92.2 M 128 12/2/2013 7:54:40 PM (Run: 1)		102	60	41.3		7291.963934		0.098078782	7.301718607	9.420926663	1.866426094	4.56802	4.5	0.31212	4.1	0.91	3.203906978	4.056030573	0.10615	1.9	0		1891	132	1734	34	1743	37	1751	62		-1		1743.41291	69.52083796	1740.712667	299.0299149
E1101-92.2 M 129 12/2/2013 7:56:22 PM (Run: 1)		155	106	64.8	0.69	2511.528781		0.102265724	7.455519549	9.255423221	1.631583187	4.68426	5.0	0.31444	4.7	0.94	3.180271374	4.701677282	0.10804	1.6	0		1968	140	1767	30	1764	42	1763	73		0		1764.441443	81.03912171	1744.355844	831.6617223		1028	14.47	1275	511566.8102	2.18	6.64	19.39	2.32	13.33	9.00	1.10
E1101-92.2 M 130 12/2/2013 7:58:03 PM (Run: 1)		153	136	42.8	0.89	1441.555202		0.064786601	7.230893266	12.38314096	2.034348227	2.28505	5.2	0.20522	4.8	0.92	4.872755153	4.809631755	0.08075	2.0	1.81549E-16		1269	89	1215	40	1208	37	1203	53		1		1207.71351	55.75055863	1194.851153	918.6412982		305	13.53	1875	514337.0344	1.41		13.92	0.47	7.36	15.56	1.20
E1101-92.2 M 132 12/2/2013 8:05:03 PM (Run: 1)		34	30	11.4	0.89	3952.141633		0.075893249	8.076278569	10.99093964	3.379661876	3.14312	5.7	0.25055	4.6	0.81	3.991217583	4.605103704	0.09098	3.4	-2.28269E-16		1479	115	1446	64	1443	44	1441	59		0		1443.328728	64.25794839	1436.690384	1111.48164		204	8.35	1412	552265.2072	1.62		15.41	0.38	5.36	12.23	2.15
E1101-92.2 M 133 12/2/2013 8:06:45 PM (Run: 1)	reverse fractionation	71	59	48.5	0.83	1518.277501		0.144733519	7.691390588	5.25578772	3.431631656	12.41312	6.4	0.47317	5.4	0.84	2.113404434	5.378811964	0.19027	3.4	-1.92474E-16		2732	197	2744	56	2636	60	2497	111		9		2636.506329	148.3295328	2475.293347	867.5142063		153	5.87	376	542169.5999	1.92	0.03	16.32	0.04	0.83	1.75	0.27
E1101-92.2 M 134 12/2/2013 8:08:26 PM (Run: 1)		87	125	25.7	1.43	1216.191422		0.058701753	6.975468625	12.47075896	2.549803708	2.15745	5.1	0.19513	4.4	0.87	5.124697445	4.443705915	0.08019	2.5	0		1153	78	1202	50	1167	36	1149	47		4		1167.602815	49.11141521	1148.239618	3340.421697		352	34.46	2210	551183.0464	1.69	0.15	12.23	1.04	15.72	21.20	1.75
E1101-92.2 M 135 12/2/2013 8:10:07 PM (Run: 1)		200	85	78.7	0.43	12020.22717		0.094213828	6.968128644	9.1666058	1.277388353	4.80480	4.5	0.31943	4.4	0.96	3.130528164	4.366369213	0.10909	1.3	9.5545E-16		1820	121	1784	23	1786	38	1787	68		0		1785.732599	76.41615938	1785.233725	757.2767287		561	10.50	1514	528643.689	0.89	0.09	3.02	0.16	2.53	6.65	0.41
E1101-92.2 M 136 12/2/2013 8:11:49 PM (Run: 1)		232	136	61.1	0.59	3201.123195		0.064951755	7.722653548	12.33076114	1.853152872	2.33483	4.9	0.20881	4.6	0.93	4.789129203	4.560310507	0.08110	1.9	0		1272	95	1224	36	1223	35	1222	51		0		1222.952604	53.73261176	1218.388988	846.1956748		247	11.16	1147	534674.4403	2.77		9.36	0.12	3.00	6.07	0.42
E1101-92.2 M 137 12/2/2013 8:13:31 PM (Run: 1)		78	152	27.1		2988.172895		0.064087603	6.841535096	12.10778371	3.168244872	2.33808	5.4	0.20532	4.4	0.81	4.870534275	4.370628064	0.08259	3.2	-2.56565E-16		1256	83	1260	62	1224	38	1204	48		4		1224.098813	50.64077788	1186.581607	3422.351239
E1101-92.2 M 138 12/2/2013 8:15:13 PM (Run: 1)		286	277	109.7	0.97	3525.509443		0.068325182	10.73709501	9.247499638	3.91673391	4.27093	6.4	0.28645	5.1	0.79	3.491039975	5.098276986	0.10814	3.9	0		1336	139	1768	72	1688	53	1624	73		8		1688.118846	80.16752501	1661.264128	1101.14868		157	7.40	593	529147.6154	3.36	0.04	23.32	0.13	1.39	3.06	0.88
E1101-92.2 M 139 12/2/2013 8:16:55 PM (Run: 1)		49	114	19.7	2.31	995.4814485		0.065818166	7.43466771	11.67357154	3.86771337	2.69591	6.0	0.22825	4.5	0.76	4.381198582	4.534064771	0.08566	3.9	0		1288	93	1331	75	1327	44	1325	54		0		1327.34929	58.10923329	1340.497427	3000.973061		311	23.33	1490	549327.5587	1.27	0.03	55.48	0.25	5.62	9.76	3.60
E1101-92.2 M 140 12/2/2013 8:18:37 PM (Run: 1)		54	127	20.0	2.35	773.7254393		0.063795859	7.207169737	12.56170673	3.492706555	2.23884	5.7	0.20397	4.6	0.79	4.902641923	4.555183231	0.07961	3.5	0		1250	87	1187	69	1193	40	1197	50		-1		1193.265577	52.66623753	1173.324017	3067.247204		345	38.59	1178	546135.8188	1.31	0.07	44.88	0.45	7.61	13.21	2.40
E1101-92.2 M 141 12/2/2013 8:27:24 PM (Run: 1)		160	106	51.7	0.67	51840.27038		0.078669118	7.144203452	11.06468203	2.056457736	3.10599	5.0	0.24925	4.6	0.91	4.012013999	4.553516924	0.09038	2.1	0		1531	105	1434	39	1434	38	1435	59		0		1434.171429	63.13512696	1425.93701	543.413848		460	10.48	1314	533869.2892	2.38		10.88		1.14	3.33	0.15
E1101-92.2 M 142 12/2/2013 8:29:06 PM (Run: 1)		450	317	159.5	0.71	21378.40108		0.078554156	7.481678934	9.484072666	1.596549781	3.93623	5.9	0.27075	5.7	0.96	3.693396013	5.716214982	0.10544	1.6	3.89286E-16		1528	110	1722	29	1621	48	1545	79		10		1621.595418	84.7335909	1546.146734	682.1779992		293	11.49	1448	528174.6963	3.29	0.13	36.26	0.57	8.55	11.76	4.79
E1101-92.2 M 143 12/2/2013 8:30:48 PM (Run: 1)		252	158	101.9	0.63	3532.842055		0.100181519	7.190989457	9.058514739	1.52045499	4.68351	4.6	0.30770	4.4	0.94	3.249919979	4.372646743	0.11039	1.5	2.67185E-16		1930	132	1806	28	1764	39	1729	66		4		1764.474261	73.58808257	1713.233744	661.6336513		213	11.41	1064	492182.7871	1.36	0.16	19.70	0.55	9.08	12.86	2.57
E1101-92.2 M 144 12/2/2013 8:32:30 PM (Run: 1)		112	94	37.1	0.84	1894.839654		0.078351421	7.099051775	11.03613163	1.802889337	3.04887	4.5	0.24404	4.1	0.91	4.097753622	4.070230106	0.09061	1.8	2.42071E-16		1525	104	1438	34	1420	34	1408	51		2		1420.032192	55.24728345	1393.841256	1688.115559		387	2.77	1199	493410.4499	3.46	0.06	27.93	0.04	0.78	3.38	0.54
E1101-92.2 M 145 12/2/2013 8:34:11 PM (Run: 1)	high U signal variance	75	126	26.4		693.0342406		0.069795609	6.918605089	12.37992261	2.785406929	2.40889	5.3	0.21629	4.6	0.85	4.623446846	4.553383683	0.08078	2.8	1.40058E-16		1364	91	1216	55	1245	38	1262	52		-4		1245.120682	55.60509527	1234.438931	4001.565081
E1101-92.2 M 146 12/2/2013 8:35:53 PM (Run: 1)		110	22	40.8	0.20	1564.254968		0.112262286	8.225589056	9.44304911	2.486927531	4.57770	5.1	0.31352	4.5	0.87	3.189637604	4.480170494	0.10590	2.5	3.18862E-16		2150	168	1730	46	1745	43	1758	69		-2		1745.151663	77.21074798	1748.548837	175.3226712		87	3.75	200	464946.3828	0.43		3.05	0.01	0.36	1.10	0.36
E1101-92.2 M 147 12/2/2013 8:37:35 PM (Run: 1)	high U signal variance	140	127	57.2	0.91	4636.292337		0.098477114	8.030912144	9.721664605	1.977002384	4.11083	6.6	0.28985	6.3	0.95	3.450093501	6.285175134	0.10286	2.0	0		1898	146	1676	37	1656	54	1641	91		2		1656.544214	100.0705411	1609.008015	1020.346697		349	14.54	1253	450261.4398	1.07	0.05	20.65	0.30	5.02	9.29	2.04
E1101-92.2 M 148 12/2/2013 8:39:17 PM (Run: 1)		204	103	102.3	0.51	12145.04462		0.125732241	6.874104542	7.828057778	1.509575949	6.83521	4.5	0.38806	4.3	0.94	2.576887893	4.257289843	0.12775	1.5	-2.76403E-16		2394	155	2067	27	2090	40	2114	77		-2		2090.204578	90.81089288	2097.14732	893.9801915		244	15.91	686	463006.1857	2.88		11.42	0.12	1.76	3.69	0.20
E1101-92.2 M 149 12/2/2013 8:40:59 PM (Run: 1)		86	45	35.1	0.53	3930.742614		0.110477722	7.233183408	9.439976339	1.927495315	4.59513	5.1	0.31461	4.8	0.93	3.17857584	4.774270741	0.10593	1.9	0		2118	145	1731	35	1748	43	1763	74		-2		1748.307993	82.48235721	1739.747669	474.1764458		358	13.77	1166	443279.0208	1.44	0.02	3.07	0.12	3.01	5.87	1.34
E1101-92.2 S 100 12/4/2013 9:50:56 PM (Run: 1)	high U signal variance	213	205	58.5	0.96	3574.34046		0.054959714	9.300066509	11.82139246	1.903695565	2.37995	4.9	0.20405	4.5	0.92	4.900778141	4.501995105	0.08459	1.9	-4.14532E-16		1081	98	1306	37	1237	35	1197	49		8		1236.904297	51.62207195	1213.374175	1058.550656		463	7.67	2472	517616.7914	9.57		14.49	0.19	2.87	9.08	0.97
E1101-92.2 S 101 12/4/2013 9:59:38 PM (Run: 1)	high U signal variance	46	48	15.0	1.04	1910.843394		0.065070241	9.995439864	11.44695852	3.562248833	2.87774	5.5	0.23891	4.3	0.77	4.185624254	4.254334286	0.08736	3.6	0		1274	123	1368	69	1376	42	1381	53		-1		1376.064811	56.91135265	1396.996272	1248.106886		151	5.30	859	528568.5617	0.38	0.03	11.16	0.08	2.98	5.25	1.89
E1101-92.2 S 102 12/4/2013 10:01:20 PM (Run: 1)	reverse fractionation	203	94	124.9	0.46	4154.148925		0.128833952	8.699832748	5.714944898	1.396672654	11.40769	3.5	0.47283	3.2	0.92	2.11490834	3.214246991	0.17498	1.4	1.97846E-16		2449	201	2606	23	2557	33	2496	67		4		2557.214376	87.12495895	2498.285197	402.7904913		133	4.71	542	511897.9031	2.58		10.90	0.07	1.34	2.39	0.42
E1101-92.2 S 103 12/4/2013 10:03:02 PM (Run: 1)		86	43	31.6	0.50	8111.924224		0.081096559	8.962312353	9.640446803	1.906385733	4.25268	3.6	0.29734	3.1	0.85	3.363109227	3.09064055	0.10373	1.9	-1.50744E-16		1576	136	1692	35	1684	30	1678	46		1		1684.288789	50.56726876	1684.511571	461.6560984		161	7.15	1287	526553.9147	1.11	0.05	3.32	0.30	5.36	9.09	2.28
E1101-92.2 S 104 12/4/2013 10:04:44 PM (Run: 1)		217	61	82.1	0.28	3468.88413		0.089314393	8.813724843	9.242198963	1.820083644	4.75833	4.2	0.31895	3.8	0.90	3.135243232	3.770628541	0.10820	1.8	2.58836E-16		1729	146	1769	33	1778	35	1785	59		-1		1777.54293	66.00184151	1786.517785	500.2785258		103	2.07	277	488435.419	0.26		2.00		0.23	0.84	0.23
E1101-92.2 S 105 12/4/2013 10:06:25 PM (Run: 1)		116	62	46.9	0.53	2299.750818		0.093755011	8.990797486	9.125948824	1.955853168	4.82995	4.6	0.31968	4.2	0.91	3.128100009	4.190493924	0.10958	2.0	0		1811	156	1792	36	1790	39	1788	65		0		1790.138468	73.45024573	1786.634419	929.6808591		340	16.62	908	479778.5868	1.02		2.64	0.07	1.68	4.67	0.40
E1101-92.2 S 106 12/4/2013 10:08:07 PM (Run: 1)		231	139	82.2	0.60	15946.34505		0.080513283	8.997507654	10.09852221	1.528652243	3.81152	5.0	0.27916	4.8	0.95	3.582160931	4.791445401	0.09902	1.5	0		1565	136	1606	29	1595	40	1587	67		1		1595.227049	73.69665696	1588.862052	550.7099772		205	4.39	1185	473719.6269	5.00	0.03	19.20	0.13	2.67	6.35	0.55
E1101-92.2 S 107 12/4/2013 10:09:49 PM (Run: 1)		67	70	26.3	1.04	2003.501825		0.083612263	8.987096594	9.94801584	2.729420831	3.85724	4.9	0.27830	4.1	0.83	3.59325431	4.084354105	0.10052	2.7	1.59344E-16		1623	140	1634	51	1605	40	1583	57		3		1604.909816	62.68643259	1576.955992	1057.713175		273	10.72	1401	481169.6303	0.91	0.04	16.77	0.30	7.26	13.60	3.03
E1101-92.2 S 108 12/4/2013 10:11:31 PM (Run: 1)	burn through?	156	82	51.3	0.52	3821.910079		0.080052639	9.390677204	10.85651485	1.412631288	3.34668	4.4	0.26351	4.1	0.95	3.794864677	4.138556773	0.09211	1.4	0		1557	141	1470	27	1492	34	1508	56		-3		1491.916914	60.49955141	1504.438297	466.8655835		92	3.73	227	456866.0095	0.35		7.50	0.04	1.23	1.99	0.65
E1101-92.2 S 109 12/4/2013 10:13:12 PM (Run: 1)	high U signal variance	182	98	54.4		4614.60847		0.078056564	9.289832242	11.00350311	2.661819801	2.95045	5.9	0.23546	5.3	0.89	4.246991093	5.267700912	0.09088	2.7	2.53373E-16		1519	136	1444	51	1395	45	1363	65		6		1395.183131	69.01606464	1351.691369	671.5873599
E1101-92.2 S 110 12/4/2013 10:14:54 PM (Run: 1)	high U signal variance	122	101	42.5	0.83	159270.6928		0.08075942	8.984768373	9.686245308	3.030116054	3.63676	5.0	0.25549	4.0	0.80	3.914088048	4.039050737	0.10324	3.0	0		1570	136	1683	56	1558	40	1467	53		13		1558.15617	56.78791294	1454.881856	560.7757867		305	28.22	977	474035.6047	4.27	0.03	11.62	0.14	1.97	4.08	1.17
E1101-92.2 S 112 12/4/2013 10:21:54 PM (Run: 1)		232	161	95.4	0.69	6768.61691		0.096267726	8.839521136	9.592481333	2.415146804	4.47729	5.6	0.31149	5.1	0.90	3.210368894	5.05247102	0.10425	2.4	2.91147E-16		1858	157	1701	44	1727	46	1748	77		-3		1726.660328	86.54848274	1738.223835	626.749014		151	7.22	1072	446061.6236	0.60	0.02	6.63	0.23	3.96	7.12	0.92
E1101-92.2 S 113 12/4/2013 10:23:36 PM (Run: 1)	burn through?	270	20	102.3	0.07	6466.308967		0.151754286	12.11335794	8.831936794	5.661900672	5.15672	10.0	0.33031	8.2	0.82	3.027415092	8.186791194	0.11323	5.7	0		2856	323	1852	102	1846	85	1840	131		1		1845.52955	148.4435426	1830.970778	136.4969609		430	10.40	591	415009.5194	1.11	0.02	4.44	0.41	3.91	2.11	0.27
E1101-92.2 S 115 12/4/2013 10:27:00 PM (Run: 1)		219	103	121.7	0.47	10629.65546		0.136898511	8.531277019	6.389604702	2.333424182	9.16430	5.1	0.42469	4.6	0.89	2.354659404	4.558839075	0.15650	2.3	0		2593	208	2418	40	2355	47	2282	88		6		2354.77641	107.894818	2264.998409	746.4816804		146	4.17	465	438687.2414	2.93		11.09	0.05	0.88	3.15	0.27
E1101-92.2 S 116 12/4/2013 10:28:42 PM (Run: 1)		188	171	84.7	0.91	1968.702905		0.102934852	8.66746607	9.044914171	2.45969401	4.88377	6.8	0.32038	6.3	0.93	3.121341193	6.338565096	0.11056	2.5	4.55741E-16		1980	163	1809	45	1799	57	1792	99		1		1799.498969	111.2205765	1768.966204	1186.327695		272	8.12	754	424655.4433	3.29		29.13	0.04	0.95	3.10	0.61
E1101-92.2 S 117 12/4/2013 10:30:24 PM (Run: 1)		125	52	48.8		11088.76104		0.100975851	9.608906106	9.218706138	2.725703236	4.71480	4.9	0.31523	4.1	0.83	3.172257247	4.078829082	0.10848	2.7	3.19555E-16		1944	178	1774	50	1770	41	1766	63		0		1769.889576	70.64402736	1757.176877	515.890578
E1101-92.2 S 118 12/4/2013 10:32:05 PM (Run: 1)		224	96	134.9	0.43	218213.9964		0.143828054	8.728170219	5.932500598	2.205009825	10.73551	5.2	0.46191	4.7	0.91	2.164914551	4.694730423	0.16856	2.2	1.71597E-16		2716	222	2543	37	2501	48	2448	96		4		2500.644999	123.2581632	2435.492555	349.1522016		185	6.84	503	424679.7192	1.70	0.05	13.69	0.05	1.21	2.91	0.57
E1101-92.2 S 119 12/4/2013 10:33:48 PM (Run: 1)		162	45	63.1	0.27	3493.222132		0.108986154	9.036911517	9.237797259	2.678850926	4.82756	5.8	0.32344	5.1	0.89	3.091753489	5.105586481	0.10825	2.7	0		2091	180	1770	49	1790	48	1807	80		-2		1789.629971	90.69021386	1797.018802	251.001995		938	12.65	1722	441429.8794	0.86	0.03	2.25	0.06	1.11	4.39	0.19
E1101-92.2 S 120 12/4/2013 10:35:30 PM (Run: 1)		108	52	78.5	0.48	39931.00617		0.165000253	8.650323828	5.215758611	2.562704029	14.36359	5.0	0.54335	4.3	0.86	1.840436355	4.293761963	0.19173	2.6	0		3087	248	2757	42	2774	47	2797	97		-1		2773.975776	142.1261473	2783.186271	328.0427314		267	10.73	663	440973.1631	5.45		10.04	0.04	1.24	3.11	0.23
E1101-92.2 S 121 12/4/2013 10:44:20 PM (Run: 1)		147	74	54.5	0.50	3105.431405		0.093459145	8.909350507	9.922019826	2.35929102	4.09403	5.9	0.29461	5.4	0.92	3.394301381	5.372213727	0.10079	2.4	-2.80301E-16		1806	154	1639	44	1653	48	1665	79		-2		1653.050175	87.1676253	1655.451962	613.9118738		750	15.89	1703	451910.0959	3.10	0.01	9.85	0.12	1.22	4.95	1.02
E1101-92.2 S 122 12/4/2013 10:46:02 PM (Run: 1)	high U signal variance	157	21	59.6	0.13	6732.307025		0.100154247	10.80773237	9.506686845	2.413630901	4.80718	6.0	0.33145	5.4	0.91	3.017041374	5.439914607	0.10519	2.4	-2.70581E-16		1929	199	1718	44	1786	50	1845	87		-7		1785.860996	99.22423696	1844.096733	160.0247448		39	0.44	37	447192.0069	0.05		2.30				0.07
E1101-92.2 S 123 12/4/2013 10:47:44 PM (Run: 1)	high U signal variance	125	38	53.3	0.30	666.5525215		0.107784475	9.720936888	8.913842827	2.303013211	5.49186	6.6	0.35504	6.2	0.94	2.816546181	6.221599573	0.11219	2.3	-2.47949E-16		2069	191	1835	42	1899	57	1959	105		-7		1899.054867	121.3478338	1954.685186	284.732714		177	8.41	530	465250.9092	1.35		4.84		0.89	2.41	0.19
E1101-92.2 S 124 12/4/2013 10:49:26 PM (Run: 1)		79	74	27.3	0.93	1063.894533		0.066136268	11.5946914	10.15468611	2.75436912	3.48269	4.7	0.25650	3.8	0.81	3.898704206	3.802706349	0.09848	2.8	-1.69596E-16		1294	145	1595	51	1523	37	1472	50		8		1523.61684	53.90181291	1494.838331	1906.163072		288	13.39	726	463217.969	0.52	0.08	11.36	0.19	4.17	11.07	4.60
E1101-92.2 S 126 12/4/2013 10:52:50 PM (Run: 1)		271	190	111.8	0.70	98883.18182		0.092398718	8.511028362	9.375662293	1.852132	4.62687	4.1	0.31462	3.7	0.89	3.178426321	3.709925594	0.10666	1.9	-5.17039E-16		1786	146	1743	34	1754	35	1763	57		-1		1754.080851	64.10638178	1761.354829	878.2159524		189	3.42	2319	478613.4443	3.22		8.93	0.17	5.27	13.58	2.54
E1101-92.2 S 127 12/4/2013 10:54:32 PM (Run: 1)	reverse fractionation	243	153	80.5	0.63	4638.677289		0.074401141	10.62329811	9.467389277	2.145277881	3.74334	4.6	0.25703	4.1	0.89	3.89055941	4.084109324	0.10563	2.1	0		1450	149	1725	39	1581	37	1475	54		15		1581.307262	57.51887568	1476.669606	849.6898993		1114	13.36	1494	506611.8342	2.74	3.29	16.34	1.77	11.21	9.61	3.65
E1101-92.2 S 128 12/4/2013 10:56:14 PM (Run: 1)		78	133	26.6	1.72	726.297529		0.062543335	8.610357978	12.52530049	2.900214778	2.39574	4.9	0.21763	3.9	0.80	4.594869456	3.912985597	0.07984	2.9	0		1226	102	1193	57	1241	35	1269	45		-6		1241.108693	48.17161879	1281.467915	3939.328606		360	22.94	1015	522159.7054	1.72		34.09	0.15	2.75	5.01	1.48
E1101-92.2 S 129 12/4/2013 10:57:56 PM (Run: 1)	high U signal variance	64	159	22.9		456.0162023		0.055569871	9.195081237	11.36947839	3.628276752	2.43497	5.6	0.20079	4.2	0.76	4.980441471	4.2414979	0.08795	3.6	-2.30856E-16		1093	98	1382	70	1253	40	1180	46		15		1253.554826	47.80433341	1219.886782	6362.130051
E1101-92.2 S 130 12/4/2013 10:59:37 PM (Run: 1)	high U signal variance	187	136	75.5	0.73	2983.693781		0.082587789	8.865310149	9.863983363	1.676059567	4.35963	4.1	0.31189	3.8	0.91	3.206261538	3.761865075	0.10138	1.7	2.81733E-16		1604	137	1650	31	1705	34	1750	58		-6		1704.481024	64.64712667	1763.601972	#VALUE!		304	9.36	637	515329.7822	3.98	2.37	27.78	0.69	5.33	3.33	0.27
E1101-92.2 S 81 12/4/2013 9:15:05 PM (Run: 1)		148	58	45.4		2889.407744		0.085549817	9.255036685	10.87475236	3.415662843	3.16185	6.2	0.24938	5.2	0.84	4.009962521	5.220406501	0.09196	3.4	-1.99242E-16		1659	147	1466	65	1448	48	1435	67		2		1447.978796	72.38540656	1423.712338	437.8085634
E1101-92.2 S 82 12/4/2013 9:16:47 PM (Run: 1)	high 206Pb/238U variance	41	37	22.2		1389.200847		0.122614385	11.97356792	7.203314495	2.896191428	7.21315	9.8	0.37684	9.3	0.95	2.653650675	9.311218959	0.13882	2.9	-2.63485E-16		2338	264	2213	50	2138	87	2062	164		7		2138.411202	191.9320099	2030.582715	1065.870736
E1101-92.2 S 83 12/4/2013 9:18:28 PM (Run: 1)		226	113	83.5	0.50	14263.28421		0.095232842	9.740983026	9.121420151	3.009046174	4.37816	5.8	0.28964	4.9	0.85	3.452608011	4.92046366	0.10963	3.0	0		1839	171	1793	55	1708	48	1640	71		9		1708.586306	78.02896502	1627.01888	549.8415188		472	10.44	1193	424034.7856	1.30	1.49	6.69	0.53	6.03	8.96	1.07
E1101-92.2 S 84 12/4/2013 9:20:10 PM (Run: 1)	high U signal variance	114	56	44.7	0.50	17648.89966		0.107126411	9.123715725	9.240044918	2.789649346	4.57442	6.0	0.30656	5.3	0.89	3.262053501	5.328155181	0.10822	2.8	-2.3902E-16		2057	178	1770	51	1745	50	1724	81		3		1744.726431	89.56996655	1702.755557	887.3345586		279	14.24	637	421435.3377	1.55	0.02	4.50	0.04	0.90	2.07	0.34
E1101-92.2 S 85 12/4/2013 9:21:52 PM (Run: 1)	high 206Pb/238U variance	250	95	120.3		28034.84047		0.122268675	13.05836438	6.657832291	6.555520883	7.84228	11.3	0.37868	9.1	0.81	2.640743041	9.142780644	0.15020	6.6	0		2332	288	2348	112	2213	101	2070	162		12		2213.563734	190.4564335	2058.525146	642.5084782
E1101-92.2 S 86 12/4/2013 9:23:34 PM (Run: 1)	high U signal variance	216	73	68.3	0.34	25622.48681		0.088922226	8.869860584	10.98351627	2.605105226	3.29646	6.1	0.26260	5.5	0.90	3.808137836	5.492606738	0.09105	2.6	-4.96577E-16		1722	146	1448	50	1480	47	1503	74		-4		1480.068863	80.15410519	1493.517143	206.5586189		569	8.53	1037	416017.9087	1.47	0.20	5.04	0.09	1.25	2.15	0.11
E1101-92.2 S 87 12/4/2013 9:25:16 PM (Run: 1)	high U signal variance	119	103	42.2	0.87	2722.636209		0.086071725	8.881556889	10.95251011	2.651195757	3.23067	5.5	0.25663	4.9	0.88	3.896680347	4.869996626	0.09130	2.7	0		1669	142	1453	50	1465	43	1473	64		-1		1464.496643	69.47191512	1448.838619	1138.823728		240	6.90	731	426784.9397	1.37		16.81	0.03	1.32	2.29	1.08
E1101-92.2 S 88 12/4/2013 9:26:58 PM (Run: 1)		29	17	9.5	0.60	152.5746864		0.086858283	10.62634119	10.97231885	5.72803468	3.13927	8.4	0.24982	6.1	0.73	4.002894198	6.134311125	0.09114	5.7	2.02218E-16		1683	172	1450	109	1442	65	1438	79		1		1442.403381	85.49471745	1417.654576	582.0121978		156	19.07	248	425922.0525	0.10		2.45	0.00	0.39	0.97	0.23
E1101-92.2 S 89 12/4/2013 9:28:40 PM (Run: 1)		17	30	5.9	1.77	227.1736486		0.066269682	9.386108622	12.67544338	6.816682479	2.37017	9.0	0.21789	5.9	0.66	4.589419095	5.919286213	0.07889	6.8	3.52191E-16		1297	118	1169	135	1234	64	1271	68		-9		1233.362051	73.28704931	1263.088323	2569.013971		186	32.94	351	456101.2033	0.36	0.02	15.88	0.06	1.59	3.30	1.26
E1101-92.2 S 90 12/4/2013 9:30:21 PM (Run: 1)		299	184	90.2	0.61	2430.106914		0.071829967	9.027935721	11.29962783	2.081013354	2.88748	4.0	0.23664	3.4	0.86	4.225896291	3.445097677	0.08850	2.1	-2.47773E-16		1402	122	1393	40	1379	30	1369	42		2		1378.712317	45.51248136	1366.432718	603.8555945		206	10.29	572	445406.3251	3.67	0.03	24.57	0.10	1.10	2.98	0.66
E1101-92.2 S 91 12/4/2013 9:35:39 PM (Run: 1)		275	128	188.1		52630.45676		0.156433375	8.94556586	5.787132301	1.850651581	12.41067	5.5	0.52090	5.1	0.94	1.919740957	5.14499981	0.17280	1.9	3.73121E-16		2938	245	2585	31	2636	51	2703	114		-5		2635.821212	157.0284222	2691.68433	231.7465353
E1101-92.2 S 92 12/4/2013 9:37:21 PM (Run: 1)		189	118	50.3		1519.442919		0.065682478	9.318308379	12.3194692	2.230506727	2.33325	4.9	0.20847	4.4	0.89	4.796767235	4.366078816	0.08117	2.2	-1.82404E-16		1286	116	1226	44	1222	35	1221	49		0		1222.481323	51.3814711	1214.965083	840.9518011
E1101-92.2 S 93 12/4/2013 9:39:03 PM (Run: 1)	high U signal variance	56	61	24.8		30209.7675		0.093227186	8.839743036	9.343673066	3.186001157	4.54800	5.5	0.30820	4.5	0.81	3.244611565	4.477013071	0.10702	3.2	2.49073E-16		1802	152	1749	58	1740	46	1732	68		1		1739.837188	75.87297764	1721.679119	1304.107561
E1101-92.2 S 94 12/4/2013 9:40:45 PM (Run: 1)		226	181	73.2	0.80	8676.107267		0.076458995	8.809370542	11.39695634	1.765602924	2.92067	5.0	0.24142	4.7	0.94	4.142184434	4.678818302	0.08774	1.8	0		1489	126	1377	34	1387	38	1394	59		-1		1387.233695	63.02503552	1383.479554	1613.062736		194	5.79	1116	442339.9203	0.82		9.18	0.15	3.28	5.92	0.99
E1101-92.2 S 95 12/4/2013 9:42:27 PM (Run: 1)	burn through?	180	131	71.8	0.73	3634.247704		0.091644987	9.452522079	9.371193085	2.265079352	4.42153	5.6	0.30052	5.1	0.92	3.327617834	5.144606178	0.10671	2.3	1.52438E-16		1772	160	1744	41	1716	47	1694	77		3		1716.500073	84.78065705	1686.434774	1342.393542		205	12.58	783	449596.4308	0.90		25.01	0.14	2.63	6.72	1.24
E1101-92.2 S 96 12/4/2013 9:44:08 PM (Run: 1)		59	118	20.9	2.01	6106.708301		0.065632532	8.688345326	12.34108168	4.435566268	2.31061	6.9	0.20681	5.3	0.77	4.83526716	5.28975899	0.08103	4.4	0		1285	108	1222	87	1216	49	1212	58		1		1215.579289	61.90483536	1186.19371	4727.595677		281	21.88	1233	464843.5857	1.77		42.76	0.27	4.89	10.97	2.58
E1101-92.2 S 98 12/4/2013 9:47:33 PM (Run: 1)		304	185	185.5	0.61	14943.58093		0.119717137	9.349390796	5.815353694	1.673478631	10.86936	4.1	0.45844	3.8	0.91	2.181329568	3.794418465	0.17196	1.7	0		2286	202	2577	28	2512	39	2433	77		6		2512.23076	98.8448772	2442.560928	569.4431407		236	10.22	1268	469759.2712	1.43	0.04	10.15	0.33	5.64	11.45	1.07
E1101-92.2 S 99 12/4/2013 9:49:14 PM (Run: 1)		154	161	42.2	1.04	3286.590081		0.052179753	9.826389256	12.35098588	2.912474819	2.26864	5.5	0.20322	4.7	0.85	4.920782873	4.684259635	0.08097	2.9	2.6041E-16		1028	98	1221	57	1203	39	1193	51		2		1202.673708	53.81590154	1218.073814	686.8461346		438	13.17	2526	497076.407	2.11	1.25	17.03	0.78	9.62	13.52	4.39
Experiment 6 - 4 December 2013
Isotope ratio and date errors include systematic calibration errors of 0.84% (207Pb/206Pb) and 6.60% (206Pb/238U) (2 sigma).
Trace element concentrations were deleted from analyses known to have intersected inclusions of non-zircon minerals based on P and Ti.
Ablation used a laser spot size of 25 microns, and a laser firing repetition rate of 10 Hz.
Activity of TiO2 for Ti-in-Zircon temperature calculation is 0.8.
[truncated: 38 more columns]
